# Supplementary material for: Coaxial Electrospinning Construction Si@C Core–Shell Nanofibers for Advanced Flexible Lithium-Ion Batteries
Source: MDPI journal article supplement (doi:10.3390/nano11123454), 2021-12-20
Supplement: s1 [file s1]

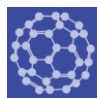

Supporting Information

# Coaxial Electrospinning Construction Si@C Core–Shell Nanofibers for Advanced Flexible Lithium-Ion Batteries

Li Zeng, Hongxue Xi, Xingang Liu \* and Chuhong Zhang \*

State Key Laboratory of Polymer Materials Engineering, Polymer Research Institute, Sichuan University, Chengdu 610065, China; zengli\_0718@foxmail.com (L.Z.); hongxue@scu.edu.cn (H.X.)

\* Correspondence: liuxingang@scu.edu.cn (X.L.); chuhong.zhang@scu.edu.cn (C.Z.)

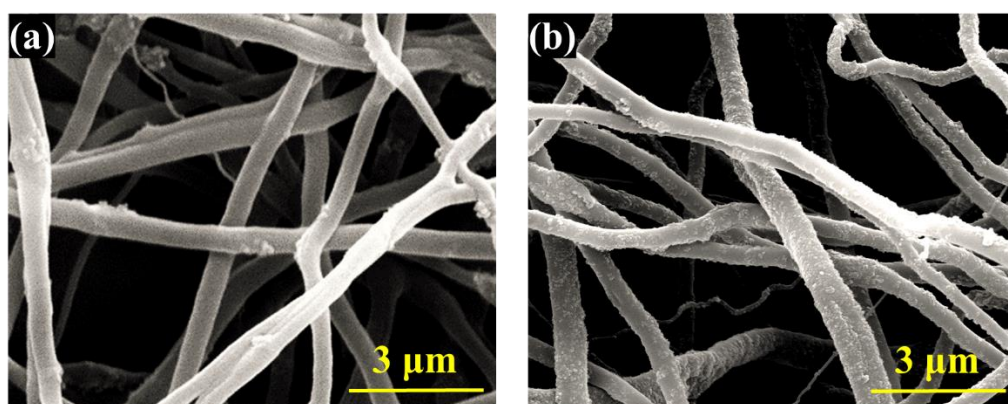

**Figure S1.** The SEM images of (a) Si@C NFs and (b) Si/C NFs.

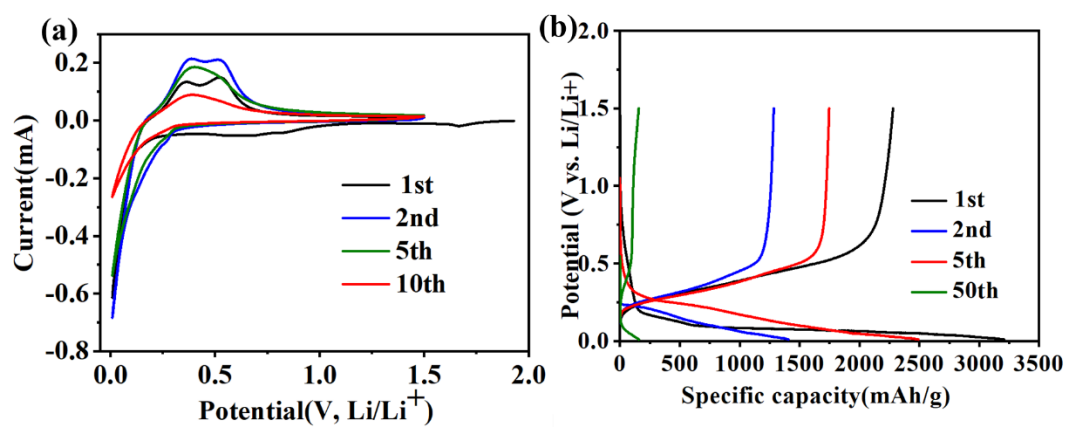

**Figure S2.** The cyclic voltammograms curves (a) and galvanostatic charge/discharge profiles (b) of different cycles of the pure Si electrode.

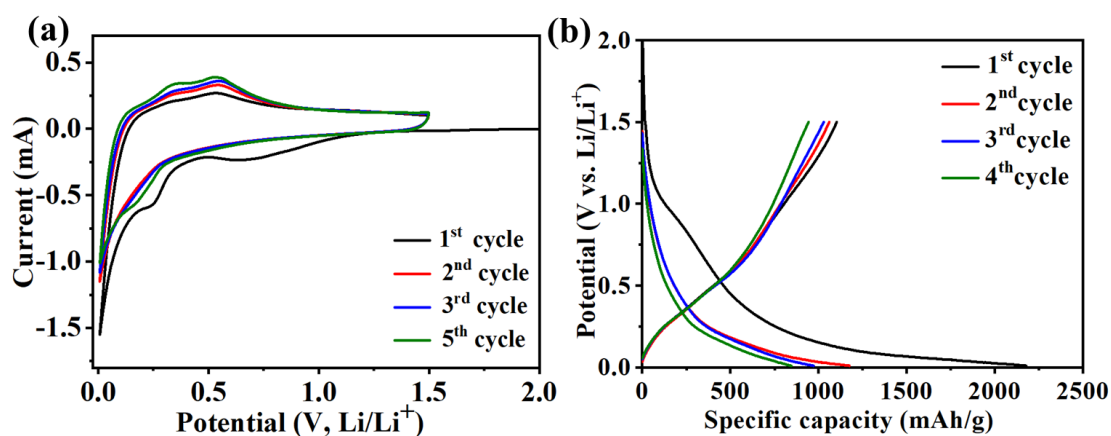

**Figure S3.** (a) CV curves at a scan rate of 0.1 mV/s and (b) charge/discharge curves at a current density of 0.1 A/g of flexible battery.

**Table S1.** Values of equivalent resistance used for fitting the experimental data.

| Component   | Fitted values |                 |                    |
|-------------|---------------|-----------------|--------------------|
|             | $R_e/\Omega$  | $R_{ct}/\Omega$ | $R_{total}/\Omega$ |
| Pure Si NPs | 11.21         | 279.9           | 291.11             |
| Si/C NFs    | 7.93          | 106             | 113.93             |
| Si@C NFs    | 1.88          | 15.48           | 17.36              |

**Table S2.** Parameters compare with previous literatures.

|           | Capacity                 | Cycle Performance                 | Flexibility |
|-----------|--------------------------|-----------------------------------|-------------|
| Ref.30    | 936 mAh/g<br>@0.1 A/g    | ~80.5% after 100 cycle<br>@0.1A/g | No          |
| Ref.31    | 1821 mAh/g<br>@0.2 C     | ~56.9% after 1000 cycles<br>@2C   | Yes         |
| Ref.32    | 1381 mAh/g<br>@0.14 A/g  | ~100% after 100 cycle<br>@0.24A/g | No          |
| Ref.33    | 1488 mAh/g<br>@0.2 A/g   | ~69.1% after 100 cycle<br>@0.5A/g | No          |
| This work | 1162.8 mAh/g<br>@0.2 A/g | ~50.8% after 100 cycle<br>@0.1A/g | Yes         |
